# Supplementary material for: The 2009–2010 Arctic polar stratospheric cloud season: a CALIPSO perspective
Source: Copernicus journal article supplement (doi:10.5194/acp-11-2161-2011), 2011-03-10
Supplement: Supplementary file 1 [file acp-11-2161-2011-supplement.zip]

Higher quality versions of these images are available by request from the authors.
